# Supplementary material for: Somatic role of SYCE2: an insulator that dissociates HP1α from H3K9me3 and potentiates DNA repair
Source: Life Sci Alliance. 2018 Jun 22;1(3):e201800021. doi: 10.26508/lsa.201800021 (PMC6238414; doi:10.26508/lsa.201800021)
Supplement: Supplementary file 1 [file LSA-2018-00021_TableS1.xls]

## Sheet: Sheet1
	Table S1. Key resources used in this study.
	Resource	Source	Catalog number
	Antibodies
	Rabbit-anti-53BP1 (Ab-1), for immunofluorescence (IF)	Calbiochem	Cat# PC712
	Rabbit-anti-ATM (Ab-3), for immunoprecipitation (IP) and Western Blot (WB)	Calbiochem	Cat# PC116
	Mouse-anti-BRCA1(Ab-1), for IF	Calbiochem	Cat# OP92
	Rabbit-anti-Cdk2 (M2), for WB	Santa Cruz	Cat# sc-163
	Mouse-anti-Chk2 (DCS-273), for WB	MBL	Cat# K0088-3
	Mouse-anti-FLAG, for IP	Sigma	Cat# F1804
	Mouse-anti-FLAG, for WB	Sigma	Cat# F3165
	Rabbit-anti-FLAG, for WB and IF	Thermofisher Scientific	Cat# PA1-984B
	Rabbit-anti-GST, for WB	Abcam	Cat# ab9085
	Rabbit-anti-H3K9 tri methyl, for WB and IF	Abcam	Cat# ab8898
	Rabbit-anti-H3, for WB	Abcam	Cat# ab1791
	Mouse-anti-HA (HA-7), for IP	Sigma	Cat# H9658
	Mouse-anti-HA-peroxidase conjugate (HA-7), for WB	Sigma	Cat# H6533
	Mouse-anti-HP1α (2HP-1H5), for IF	Euromedex	Cat# 2HP-1H5-AS
	Goat-anti-HP1α, for WB and IP	Abcam	Cat# ab77256
	Mouse-anti-p53 (DO-1), for WB	Santa Cruz	Cat# sc-126
	Rabbit-anti-Rad51, for IF	Bioacademia	Cat# 70-001
	Rabbit-anti-Rad51 (Ab-1), for WB	Calbiochem	Cat# PC130
	Mouse-anti-phospho-ATM (Ser1981), for IF	Millipore	Cat# 05-740
	Rabbit-anti-phospho-ATM (Ser1981), for WB	Cell Signaling	Cat# 4526
	Rabbit-anti-phospho-ATM (Ser1981), for IF	Abcam	Cat# ab81292
	Rabbit-anti-phospho-Chk2 (Thr68), for WB	Cell Signaling	Cat# 2661
	Mouse-anti-phospho-Histone H2A.X (Ser139), for IF	Millipore	Cat# 05-636
	Rabbit-anti-gamma-H2AX, for IF	Bethyl	Cat# A300-081A
	Rabbit-anti-phospho-p53 (Ser15), for WB	Cell Signaling	Cat# 9284
	Sheep-anti-mouse IgG, HRP-linked, for WB	GE Healthcare	Cat# NA931V
	Donkey-anti-rabbit IgG, HRP-linked, for WB	GE Healthcare	Cat# NA934V
	Rabbit-anti-goat IgG, HRP-linked, for WB	Bethyl	Cat# 14-13-06
	Goat-anti-mouse IgG AlexaFluor 488, for IF	Invitrogen	Cat# A11001
	Donkey-anti-mouse IgG AlexaFluor 555, for IF	Invitrogen	Cat# A31570
	Donkey-anti-rabbit IgG AlexaFluor 488, for IF	Invitrogen	Cat# A21206
	Donkey-anti-rabbit IgG AlexaFluor 555, for IF	Invitrogen	Cat# A31572
	Chicken-anti-goat IgG AlexaFluor 488, for IF	Invitrogen	Cat# A21467
	Donkey-anti-goat IgG AlexaFluor 555, for IF	Invitrogen	Cat# A21432
	RNA Samples
	Human Normal Testis Total RNA	Clontech	Cat# 636533
	Human Tumor RNA: Bladder	Ambion	Cat# 7249
	Human Tumor RNA: Cervix	Ambion	Cat# 7277
	Human Tumor RNA: Colon	Ambion	Cat# 7237
	Human Tumor RNA: Kidney	Ambion	Cat# 7253
	Human Tumor RNA: Lung	Ambion	Cat# 7225
	Human Tumor RNA: Ovary	Ambion	Cat# 7257
	Human Tumor RNA: Pancreas	Ambion	Cat# 7229
	Human Tumor RNA: Prostate	Ambion	Cat# 7289
	Human Tumor RNA: Stomach	Ambion	Cat# 7265
	Human Tumor RNA: Thyroid	Ambion	Cat# 7241
	Human Tumor RNA: Uterus	Ambion	Cat# 7233
	Human Tumor/Normal Adjacent Tissue RNA: Kidney	Ambion	Cat# 7252
	Human Tumor/Normal Non-adjacent Tissue RNA: Lymphoma	Ambion	Cat# 7268
	Human Tumor/Normal Adjacent Tissue RNA: Stomach	Ambion	Cat# 7264
	Chemicals
	Cisplatin	Nippon Kayaku	Cat# 170007472
	ATM inhibitor KU-55933	Sigma-Aldrich	Cat# SML1109
	Recombinant Proteins
	Recombinant protein: Human SYCE2	Origene Technologies	Cat# TP325261
	Recombinant protein: Human CBX5 (HP1α)	Origene Technologies	Cat# TP760487
	Recombinant protein: Human H3K9me3	Active Motif	Cat# 31279
	Recombinant protein: GST	Sigma-Aldrich	Cat# SRP5348
	Cell Lines
	Human: MCF7	ATCC	ATCC HTB-22
	Human: RPE h-TERT	Clontech	Cat# C4000-1
	Human: HeLa-DRGFP	Sakamoto et al. 2007	N/A
	Monkey: COS7	ATCC	ATCC CRL-1651
	Human: DLD1	ATCC	ATCC CCL-221
	Human: HEK293	ATCC	ATCC CRL-1573
	Human: HT1080	ATCC	ATCC CCL-121
