# Supplementary material for: Somatic role of SYCE2: an insulator that dissociates HP1α from H3K9me3 and potentiates DNA repair
Source: Life Sci Alliance. 2018 Jun 22;1(3):e201800021. doi: 10.26508/lsa.201800021 (PMC6238414; doi:10.26508/lsa.201800021)
Supplement: Supplementary file 2 [file LSA-2018-00021_TableS2.xls]

## Sheet: Sheet1
Table S2. Sequences of the primers used in RT-PCR experiments.
Primer name	Sequence
SYCE2-F	5'-AATACGGAATGGAGCGACAG-3'
SYCE2-R1	5'-TCAGATCCGAAACCTTGGTC-3'
FLAG-SYCE2-F	5'-GGATCCACCATGGGGGACTACAAGGACGACGA TGACAAGTCCGGGATGGAGCGACAGGGAGTGGA-3'
SYCE2-R2	5'-GAATTCCTGTCAGCATTCACCATCTC-3'
GAPDH-F	5'-TGTTGCCATCAATGACC-3'
GAPDH-R	5'-TCTCATGGTTCACACCCA-3'
