# Supplementary material for: Somatic role of SYCE2: an insulator that dissociates HP1α from H3K9me3 and potentiates DNA repair
Source: Life Sci Alliance. 2018 Jun 22;1(3):e201800021. doi: 10.26508/lsa.201800021 (PMC6238414; doi:10.26508/lsa.201800021)
Supplement: Supplementary file 4 [file LSA-2018-00021_TableS4.xls]

## Sheet: Sheet1
Table S4. Sequences of the primers used in DNA ligation assay.
Primer name	Sequence
pEGFP-rejoining-F	5'-ACGAGAAGCGCGATCACAT-3'
pEGFP-rejoining-R	5'-GGGAGGTGTGGGAGGTTTT-3'
pEGFP-input-F	5'-CCTGAAACATAAAATGAATGCAA-3'
pEGFP-input-R	5'-CGCGTTAAGATACATTGATGAGTT-3'
