# Supplementary material for: Somatic role of SYCE2: an insulator that dissociates HP1α from H3K9me3 and potentiates DNA repair
Source: Life Sci Alliance. 2018 Jun 22;1(3):e201800021. doi: 10.26508/lsa.201800021 (PMC6238414; doi:10.26508/lsa.201800021)
Supplement: Supplementary file 5 [file LSA-2018-00021_TableS5.xls]

## Sheet: Sheet1
	Table S5. Sequences of the primers for construction of expression vectors for HP1α and SYCE2 deletion mutants.
	Mutant	Primer set	Sequence
	SYCE2-aa 1-88	BamHI-FLAG-SYCE2-aa1-F	5'-GGATCCACCATGGGGGACTA-3'
		XbaI-SYCE2-aa88-R	5'-TCTAGATTAGTCCTTTTGCCGGCTCTTGT-3'
	SYCE2-aa 57-218	ClaI-SYCE2-aa57-F	5'-ATCGATGGACTCTACTTCTCCTCTCT-3'
		XbaI-SYCE2-aa218-R	5'-ATCGATAGCCTAAGACTCAGATG-3'
	SYCE2-aa 88-218	ClaI-SYCE2-aa88-F	5'-ATCGATGACCATGCACTCATGACCAA-3'
		XbaI-SYCE2-aa218-R	5'-ATCGATAGCCTAAGACTCAGATG-3'
	HP1α-full length	ClaI-HP1α-aa1-F	5'-ATCGATATGGGAAAGAAAACCAAGCGG-3'
		XbaI-HP1α-aa191-R	5'-GGTCTAGATTAGCTCTTTGCTGTTTCTTTC-3'
	HP1α-CD	ClaI-HP1α-aa1-F	5'-ATCGATATGGGAAAGAAAACCAAGCGG-3'
		XbaI-HP1α-aa66-R	5'-TCTAGATTA AAATTCAGAAATTAGCTCAGGGC-3'
	HP1α-CD+IVR	ClaI-HP1α-aa1-F	5'-ATCGATATGGGAAAGAAAACCAAGCGG-3'
		XbaI-HP1α-aa119-R	5'-TCTAGATTATCTCTCAAAGCCCCGAGC-3'
	HP1α-IVR	ClaI-HP1α-aa67-F	5'-ATCGATATGAAAAAGTATAAGAAGATGAAG-3'
		XbaI-HP1α-aa119-R	5'-TCTAGATTATCTCTCAAAGCCCCGAGC-3'
	HP1α-IVR+CSD	ClaI-HP1α-aa67-F	5'-ATCGATATGAAAAAGTATAAGAAGATGAAG-3'
		XbaI-HP1α-aa191-R	5'-GGTCTAGATTAGCTCTTTGCTGTTTCTTTC-3'
	HP1α-CSD	ClaI-HP1α-aa120-F	5'-ATCGATGGACTGGAACCAGAAAAGAT-3'
		XbaI-HP1α-aa191-R	5'-GGTCTAGATTAGCTCTTTGCTGTTTCTTTC-3'
