# Supplementary material for: Somatic role of SYCE2: an insulator that dissociates HP1α from H3K9me3 and potentiates DNA repair
Source: Life Sci Alliance. 2018 Jun 22;1(3):e201800021. doi: 10.26508/lsa.201800021 (PMC6238414; doi:10.26508/lsa.201800021)
Supplement: Supplementary file 6 [file LSA-2018-00021_TableS6.xls]

## Sheet: Sheet1
	Table S6. Primers used for creating mutants of HP1α (V23M and KW41/42AA) and SYCE2 by mutagenesis.
	Primer name	Sequence
	SYCE2-del-PHVKC-F	5'-GTGGACGTGAAAGACCAGGAACCGCAG-3'
	SYCE2-del-PHVKC-R	5'-TGGTCTTTCACGTCCACTCCCTGTCG-3'
	SYCE2-del-LTVLEGKS-F	5'-TTGCCAGGGACTCTACTTCTCCTCT-3'
	SYCE2-del-LTVLEGKS-R	5'-TAGAGTCCCTGGCAACTGGCACTAGCT-3'
	SYCE2-V51D-F	5'-CTGACGGACCTGGAAGGGAAGTCGGG-3'
	SYCE2-V51D-R	5'-TTCCAGGTCCGTCAGCTGGCAACTG-3'
	SYCE2-L49E/V51D/L52E-F	5'-AGGAGACGGACGAGGAAGGGAAGTCGGGACT-3'
	SYCE2-L49E/V51D/L52E-R	5'-CCTCGTCCGTCTCCTGGCAACTGGCACTAGC-3'
	SYCE2-L49E/V51D/L52E/G53E/K54N-F	5'-GGAAGAGAACTCGGGACTCTACTTCTCC-3'
	SYCE2-L49E/V51D/L52E/G53E/K54N-R	5'-CCCGAGTTCTCTTCCTCGTCCGTCTCCT-3'
	HP1α-V23M-F	5'-TATGTTATGGAGAAGGTGCTAGACAGG-3'
	HP1α-V23M-R	5'-CTTCTCCATAACATACTCCTCCTCATC-3'
	HP1α-KW41/42AA-F	5'-ACTGGCGGCGAAAGGCTTTTCTGAGGAG-3'
	HP1α-KW41/42AA-R	5'-CCTTTCGCCGCCAGTAGATATTCCACTTG-3'
